# Supplementary material for: Methodological keys for accurate simulations
Source: Royal Society of Chemistry journal article supplement (doi:10.1039/c3cp50791b), 2013-01-01
Supplement: c3cp50791b.pdf [file c3cp50791b.pdf]

# Methodological Keys For Accurate $pK_a^*$ Simulations: Supplementary Information

Ymène Houari<sup>a</sup>, Denis Jacquemin<sup>a,b</sup>, and Adele D. Laurent<sup>\*a</sup>

<sup>a</sup> Laboratoire CEISAM - UMR CNRS 6230, Université de Nantes,

2 Rue de la Houssinière, BP 92208, 44322 Nantes Cedex 3, France.

<sup>b</sup> Institut Universitaire de France, 103 bd St. Michel, 75005 Paris Cedex 5, France.

February 21, 2013

## 1 Absorption and emission wavelenghts of the training set

Table S1: Maximum absorption wavelenght (in nm) of protonated/deprotonated forms of the training set (See Figure 2 of the main manuscript) using the IE-TD-DFT/PBE0 level of theory

|          | LR      |         | cLR     |         | SS      |         | Exp.                 |
|----------|---------|---------|---------|---------|---------|---------|----------------------|
|          | eq      | neq     | eq      | neq     | eq      | neq     |                      |
| <b>1</b> | 305/364 | 299/356 | 303/373 | 300/362 | 315/394 | 301/364 | 380/445 <sup>?</sup> |
| <b>2</b> | 306/362 | 301/354 | 302/362 | 300/355 | 304/371 | 300/356 | -                    |
| <b>3</b> | 340/430 | 333/420 | 343/450 | 336/429 | 361/475 | 338/475 | 337/371 <sup>?</sup> |
| <b>4</b> | 318/378 | 311/365 | 315/376 | 311/364 | 322/377 | 311/365 | 338/360 <sup>?</sup> |
| <b>5</b> | 340/423 | 335/415 | 343/440 | 337/423 | 355/465 | 338/426 | 350/380 <sup>?</sup> |
| <b>6</b> | 340/420 | 333/406 | 340/422 | 334/409 | 352/433 | 335/410 | 342/382 <sup>?</sup> |

Table S2: Maximum emission wavelength (in nm) of the training set (See Figure 2 of the main manuscript) using the IE-TD-DFT/PBE0 level of theory

|          | LR(eq)  | cLR(eq) | SS(eq)  | SS(neq) | Exp.                 |
|----------|---------|---------|---------|---------|----------------------|
| <b>1</b> | 347/411 | 352/443 | 366/472 | 366/472 | 350/550 <sup>1</sup> |
| <b>2</b> | 299/396 | 335/410 | 330/423 | 302/423 | 358/415 <sup>2</sup> |
| <b>3</b> | 382/492 | 396/548 | 417/587 | 417/587 | 430/630 <sup>3</sup> |
| <b>4</b> | 350/410 | 353/426 | 360/435 | 360/435 | 360/500 <sup>3</sup> |
| <b>5</b> | 374/475 | 383/517 | 397/554 | 397/554 | 380/530 <sup>3</sup> |
| <b>6</b> | 374/461 | 383/494 | 396/510 | 396/510 | 410/510 <sup>3</sup> |

## 2 $pK_a$ results for hydroxystilbenes

Table S3 gathered PBE0 and M06-2X  $pK_a$  results for hydroxystilbenes as only M06-2X data are shown in the main manuscript. We observe that results using IE solvent model give a rather small deviation between PBE0 and M06-2X functionals, as for the training set.

Table S3: Computed  $pK_a$  values of hydroxystilbenes

|          | PBE0 |      | M06-2X |      |      | Exp.              |
|----------|------|------|--------|------|------|-------------------|
|          | PCM  | IE   | PCM    | SMD  | IE   |                   |
| <b>7</b> | 13.8 | 10.8 | 13.3   | 11.9 | 11.2 | 10.1 <sup>4</sup> |
| <b>8</b> | 11.0 | 9.7  | 12.1   | 11.4 | 9.0  | 9.3 <sup>4</sup>  |

## References

- [1] Harris, C. M.; Selinger, B. K. *J. Phys. Chem.* **1980**, *84*, 891–898.
- [2] Harris, C. M.; Selinger, B. K. *J. Phys. Chem.* **1980**, *84*, 1366–1371.
- [3] Huppert, D.; Tolbert, L. M.; Linares-Samaniego, S. *J. Phys. Chem. A* **1997**, *101*, 4602–4605.
- [4] Lewis, F. D.; Crompton, E. M. *J. Am. Chem. Soc.* **2003**, *125*, 4044–4045.
